1 **PREVALENCE OF UGT1A1 GENETIC VARIANTS IN ARGENTINEAN POPULATION,**  
2 **POTENTIAL IMPLICATIONS FOR PHARMACOGENOMIC TESTING**

3

4 Cintia V. Cruz<sup>1,2</sup>, Paula Scibona<sup>1</sup>, Waldo H. Belloso<sup>1</sup>.

5

6 1. Clinical Pharmacology Section, Internal Medicine Service.

7 Hospital Italiano de Buenos Aires

8 Juan Domingo Perón 4190 (CP C1181)

9 Ciudad Autónoma de Buenos Aires, Argentina.

10 2. Laboratorio de Estadística Aplicada a las Ciencias de la Salud (LEACS)

11 Departamento de Farmacología y Toxicología 2da Unidad Académica

12 Universidad de Buenos Aires

13 Paraguay 2155 (CP C1121)

14 Ciudad Autónoma de Buenos Aires, Argentina

15 **ABSTRACT**

16 The four groups of uridine diphosphate glucuronosyltransferase (UGT) enzymes form a  
17 superfamily responsible for the glucuronidation of target substrates. These include hormones,  
18 flavonoids, environmental mutagens and pharmaceutical drugs. Thus, UGT enzymes are  
19 relevant for pharmacogenetic research.

20 Most of the members of the UGT family are expressed in the liver, but are also present in  
21 intestinal, stomach or breast tissue.

22 The incidences and types of polymorphisms for different enzymes vary with geographical  
23 regions and ethnic groups. This is the first study that examined the frequency of polymorphisms  
24 for UGT1 isozymes for a population of 100 healthy argentinians.

25 The distribution of UGT1A1 in our population was: 70.5% (70.5) for the \*1 allele, 21.5% for the  
26 \*28 allele and 1% for the \*36 allele. 48% (48) presented the \*1/\*1 genotype, while 43 % (43) had

27 \*1/\*28, 2% (2) had \*1/\*36 and 7% (7) showed \*28/\*28. There was no preferential sex  
28 distribution.

29 Since most Argentinians are of Caucasian descent, a European genotype frequency profile is to  
30 be expected. That is evident in the wild type prevalence in our population. However, the  
31 contribution of Native American ancestry to gene pool components may in part explain the  
32 higher prevalence of the \*28 genotype in UGT1A1 \*1 in our population, in comparison with  
33 European cohorts.

## 34 **INTRODUCTION**

35 The uridine diphosphate glucuronosyltransferase (UGT) enzymes conform a superfamily of  
36 enzymes responsible for the glucuronidation of target substrates. The transfer of glucuronic acid  
37 renders xenobiotics and other endogenous compounds water soluble, allowing for their biliary or  
38 renal excretion. The UGT superfamily is responsible for the glucuronidation of hundreds of  
39 compounds, including hormones, flavonoids and environmental mutagens. Most of the  
40 members of the UGT family are expressed in the liver, as well as in other type of tissues, such  
41 as intestinal, stomach or breast. A few members are expressed only outside the liver such as  
42 UGT1A7, UGT1A8, UGT1A10 and UGT2A1. UGT superfamily is composed by four families:  
43 UGT1A, UGT2, UGT3 and UGT8. UGT2 is further divided into two subfamilies, UGT2A and  
44 UGT2B, both of which present on chromosome 4. Although limited studies are already available  
45 on UGT2A enzymes, they appear to be involved in the glucuronidation of compounds such as  
46 phenolic odorants and polycyclic aromatic hydrocarbon metabolites. UGT2B proteins are mainly  
47 responsible for the metabolism of steroids. The roles of UGT3 and UGT8 family members have  
48 not been well characterized yet.

49 The UGT1A family is located on chromosome 2q37(1), and members of this group  
50 glucuronidate a large variety of compounds. Pharmaceutical drugs are also a common substrate  
51 of the UGT family, turning the enzymes in this group relevant for pharmacogenetic research(2).

52 Bilirubin-UGT (*UGT1A1*) conjugates bilirubin with glucuronic acid, converting the bilirubin into a  
53 water-soluble form that is readily excreted in bile. Mutations of bilirubin UDP-glucuronosyl  
54 transferase causes hereditary unconjugated hyperbilirubinemias, including Crigler-Najjar and  
55 Gilbert syndromes(3).

56 The genetic defect in patients with Gilbert syndrome involves the promoter region of  
57 *UGT1A1*(4,5). Gilbert syndrome manifests only in people homozygous for the variant promoter.  
58 As a result, its inheritance is most consistent with an autosomal recessive trait. However,  
59 heterozygotes for the Gilbert genotype have higher average plasma bilirubin concentrations  
60 compared with those with two wild-type alleles. It is estimated that 9 percent of individuals in the  
61 Western general population world are homozygous for the variant promoter, and up to 42  
62 percent are heterozygous(5).

63 Characterization of the *UGT1A* gene locus has permitted an understanding of the molecular  
64 defects responsible for the Gilbert syndrome. The mutation responsible for Gilbert syndrome is  
65 in the promoter region, upstream to exon 1 of *UGT1A1*. The normal sequence of the TATAA  
66 element within the promoter is A[TA]6TAA. Caucasian and black patients with Gilbert syndrome  
67 are homozygous for a longer version of the TATAA sequence, A[TA]7TAA, which causes  
68 reduced production of bilirubin-UGT. This variant is termed *UGT1A1\*28*(6).

69 This longer TATAA element has been found in all individuals with Gilbert syndrome studied in  
70 the United States, Europe, and countries of the Middle East and South Asia. However, other  
71 factors are probably involved in the expression of Gilbert phenotype since not all patients who  
72 are homozygous for the variant promoter develop hyperbilirubinemia. Furthermore, in the

73 Japanese population, other mutations within the coding regions of *UGT1A1* can be the  
74 underlying cause of the Gilbert phenotype.

75 Since bilirubin-UGT is involved in the glucuronidation of several important drugs, individuals with  
76 Gilbert syndrome may be more susceptible to the toxic effect of substances that require  
77 bilirubin-UGT-mediated hepatic glucuronidation prior to excretion. Gilbert syndrome is known to  
78 increase the risk of drug toxicity with irinotecan and the hyperbilirubinemia associated with  
79 atazanavir(2,7).

80 The active metabolite of irinotecan, SN-38, is glucuronized in the liver mainly by bilirubin-UGT.  
81 The major dose-limiting toxicity of this drug is diarrhoea. In patients who inherit certain *UGT1A1*  
82 polymorphisms, reduced glucuronidation of SN-38 leads to an increased incidence of diarrhoea.  
83 The symptoms can be severe enough to warrant switching to other drugs. Thus, it is currently  
84 recommended to test the *UGT1A1* polymorphism prior to the administration of Irinotecan and to  
85 adjust the dose according to the resulting genotype(8).

86 As previously stated, some drugs may induce hyperbilirubinemia in patients with Gilbert  
87 syndrome. Atazanavir, an antiretroviral medication, is an inhibitor of bilirubin-UGT activity and is  
88 associated with hyperbilirubinemia(9). Isolated hyperbilirubinemia has also been reported during  
89 the treatment of hepatitis C with peginterferon and ribavirin and in patients receiving pazopanib.  
90 In such cases, discontinuation of therapy is usually not necessary(10).

91 The incidences and types of the polymorphisms for these enzymes are quite different according  
92 to geographical regions and ethnic groups. The aim of this study is to estimate the prevalence of  
93 *UGT1A1* polymorphism in the Argentine population and to evaluate what clinical implications  
94 this might have.

## 95 **MATERIAL AND METHODS**

96 [dx.doi.org/10.17504/protocols.io.6sjhecn](http://dx.doi.org/10.17504/protocols.io.6sjhecn)

## 97 **Study population**

98 One hundred random and anonymized DNA samples from healthy donors were analysed. The  
99 Hospital Italiano de Buenos Aires DNA Bank collection project has the approval of the local  
100 ethic committee and all the volunteer subjects signed an informed consent.

## 101 **Sample collection and DNA extraction**

102 Following an informed consent process, 10 mL of peripheral blood were collected from each  
103 subject in 5-mL EDTA tubes. Whole blood samples were stored at 4°C until the time of  
104 processing. Genomic DNA was extracted and purified using the QI Amp DNA Blood Mini kit  
105 (QIAGEN).

## 106 **Genotyping of UGT1A1**

107 Genomic DNA was extracted from 200 µL of whole blood using QIAamp DNA Mini kit (Qiagen,  
108 GmbH, D-40724 Hilden, Germany). The polymerase chain reaction (PCR) was performed in a  
109 final volume of 20 µL. The forward primer was 5'- CAGCCTCAAGACCCACACA – 3' and the  
110 reverse primer was 5'- TGCTCCTGCCAGAGGTTC -3'. The PCR conditions were 5 minutes at  
111 95°C, followed by 35 cycles of 30 seconds at 95°C, 60 seconds at 61°C, 60 seconds at 72°C,  
112 and final extension for 10 minutes at 72°C. The PCR product was detected on 2% agarose gels  
113 by means of ethidium bromide staining. The presence of variant UGT1A1 was confirmed by  
114 direct sequencing of PCR products on an automated ABI 3100 capillary sequencer (Applied  
115 Biosystems, Foster City, Calif) using the Big Dye Terminator Cycle Sequencing Kit (Applied  
116 Biosystems).

## 117 **STATISTICAL ANALYSIS**

118 Allelic and genotypic frequencies were expressed in absolute and percentage values in the  
119 study population. Sample size calculation based on the estimation of a 4% prevalence of TT  
120 genotype as published for european population was of 64 samples, while for a prevalence of 7  
121 % as in global population was of 110 samples, with an alpha error of 5 %. The results obtained  
122 were further evaluated for Hardy-Weinberg equilibrium.

## 123 **RESULTS**

124 The genotyping of all samples was according to the method previously described. Among  
125 the 100 subjects analysed, 49% (49) were male and 51% (51) were female with a median age  
126 of 43 and a range of 32-80 years.

127 In our population, the distribution of UGT1A1 was -Figure 1 attached separately-: 70.5%  
128 (70.5) for the \*1 allele, 21.5% for the \*28 allele and 1% for the \*36 allele. 48% (48) presented  
129 the \*1/\*1 genotype, while 43 % (43) had \*1/\*28, 2% (2) had \*1/\*36 and 7% (7) showed \*28/\*28.  
130 No preferential sex distribution was observed between genotypes.

## 131 **DISCUSSION**

132 UGT 1A1 is the major UGT isoform responsible for glucuronidation of bilirubin in human liver,  
133 and it is capable of conjugating various phenols, anthraquinones and flavones. Mutations of  
134 bilirubin UDP-glucuronosyl transferase causes hereditary unconjugated hyperbilirubinemia and  
135 can also alter the metabolism of certain drugs.

136 In our population of 100 healthy argentinian volunteers, the distribution of the UGT1A1 showed  
137 a predominance of the \*1 allele whereas the \*28 allele showed a relatively high prevalence of  
138 21,5%.

139 Compared to this, in a cohort of 245 healthy men and women, aged 20-40 years of Caucasians  
140 and Asians the frequencies of the UGT1A1 genotypes were 53,7% for 6/6 \*1, 34,8% for 6/7 \*1-  
141 28, 9,8% for 7/7 \*28, 0.8% for 5/6 and 0.8% for 6/8 \*1-38 promoter TA repeats. Both allele and  
142 genotype frequencies varied by race ( $P < 0.02$ ), with 11% of the Caucasians and none of the  
143 Asians having the 7/7 \*28 genotype. Overall, 8% were homozygous variant for both UGT1  
144 polymorphisms and 43% had at least one variant allele for both UGT1A1\*28 and  
145 UGT1A6\*2(11).

146 The incidences and types of the polymorphisms for these enzymes vary according to  
147 geographical regions and ethnic groups. This is the first study that has examined the frequency  
148 of polymorphisms for UGT1 isozymes for a population of healthy argentinians.

149 Since most Argentinian inhabitants are of Caucasian descent, a European genotype frequency  
150 profile is to be expected. That is evident in the wild type prevalence in our population and the  
151 one from Lampe et. al. However, the contribution of Native American ancestry to gene pool  
152 components may in part explain the higher prevalence of the \*28 genotype in UGT1A1 \*1 in our  
153 population, in comparison with the 11% observed in the European study. This finding provides  
154 additional information to the ongoing controversy regarding which population -if any- can be  
155 used as a general reference for Argentinian genotypic profiles.

156 A limitation of our results is that all the volunteers evaluated are from the Capital City of Buenos  
157 Aires, Argentina. This does leave aside a considerable amount of variant genomics particularly  
158 in a vast country that has a longstanding history of racial mixture.

159 Understanding these polymorphisms and the characterization of these in different populations is  
160 essential for the prevention of adverse effects of a considerable number of drugs and also for  
161 the reduction of cancer-associated risks.

## 162 **BIBLIOGRAPHY**

- 163 1. Ritters JK, Crawford JM, Owens IS. Cloning of Two Human Liver Bilirubin UDP-  
164 glucuronosyl-transferase cDNAs with Expression in COS-1 Cells\* [Internet]. Vol. 266,  
165 THE JOURNAL OF BIOLOGICAL CHEMISTRY. 1991 [cited 2019 Jul 25]. Available from:  
166 <https://pdfs.semanticscholar.org/fc04/60a9df009db16a3d3054109329ee6d04d3ed.pdf>
- 167 2. Burchell B, Soars M, Monaghan G, Cassidy A, Smith D, Ethell B. Drug-mediated toxicity  
168 caused by genetic deficiency of UDP-glucuronosyltransferases. Toxicol Lett [Internet].  
169 2000 Mar 15 [cited 2019 Jul 25];112–113:333–40. Available from:  
170 <http://www.ncbi.nlm.nih.gov/pubmed/10720749>
- 171 3. Maruo Y, Iwai M, Mori A, Sato H, Takeuchi Y. Polymorphism of UDP-  
172 Glucuronosyltransferase and Drug Metabolism. Curr Drug Metab [Internet]. 2005 Apr 1  
173 [cited 2019 Aug 8];6(2):91–9. Available from:  
174 <http://www.eurekaselect.com/openurl/content.php?genre=article&issn=1389->

- 175 2002&volume=6&issue=2&spage=91
- 176 4. Fretzayas A, Moustaki M, Liapi O, Karpathios T. Eponym. Eur J Pediatr [Internet]. 2012
- 177 Jan 9 [cited 2019 Jul 25];171(1):11–5. Available from:
- 178 <http://www.ncbi.nlm.nih.gov/pubmed/22160004>
- 179 5. Bosma PJ, Chowdhury JR, Bakker C, Gantla S, de Boer A, Oostra BA, et al. The genetic
- 180 basis of the reduced expression of bilirubin UDP-glucuronosyltransferase 1 in Gilbert's
- 181 syndrome. N Engl J Med [Internet]. 1995 Nov 2 [cited 2019 Jul 25];333(18):1171–5.
- 182 Available from: <http://www.nejm.org/doi/abs/10.1056/NEJM199511023331802>
- 183 6. Kaplan M, Hammerman C. Bilirubin and the Genome: The Hereditary Basis of
- 184 Unconjugated Neonatal Hyperbilirubinemia [Internet]. Vol. 3, Current Pharmacogenomics.
- 185 2005 [cited 2019 Jul 25]. Available from:
- 186 <https://pdfs.semanticscholar.org/f2d5/9c4046254e0ec0d10b17ad2ad894ca41e1e4.pdf>
- 187 7. Iyer L, King CD, Whittington PF, Green MD, Roy SK, Tephly TR, et al. Genetic
- 188 predisposition to the metabolism of irinotecan (CPT-11). Role of uridine diphosphate
- 189 glucuronosyltransferase isoform 1A1 in the glucuronidation of its active metabolite (SN-
- 190 38) in human liver microsomes. J Clin Invest [Internet]. 1998 Feb 15 [cited 2019 Jul
- 191 25];101(4):847–54. Available from: <http://www.jci.org/articles/view/915>
- 192 8. Table of Pharmacogenomic Biomarkers in Drug Labeling | FDA [Internet]. [cited 2019 Jul
- 193 25]. Available from: [https://www.fda.gov/drugs/science-research-drugs/table-](https://www.fda.gov/drugs/science-research-drugs/table-pharmacogenomic-biomarkers-drug-labeling)
- 194 [pharmacogenomic-biomarkers-drug-labeling](https://www.fda.gov/drugs/science-research-drugs/table-pharmacogenomic-biomarkers-drug-labeling)
- 195 9. Laprise C, Baril J-G, Dufresne S, Trottier H. Atazanavir and Other Determinants of
- 196 Hyperbilirubinemia in a Cohort of 1150 HIV-Positive Patients: Results from 9 Years of
- 197 Follow-Up. AIDS Patient Care STDS [Internet]. 2013 Jul 5 [cited 2019 Jul 25];27(7):378–
- 198 86. Available from: <http://www.liebertpub.com/doi/10.1089/apc.2013.0009>
- 199 10. Zwirtes R, Narasimhan P, Wind-Rotolo MM, Xu D, Hruska MW, Kishnani N, et al.
- 200 Mechanisms of Hyperbilirubinemia During Peginterferon Lambda-1a Therapy for Chronic



201 Hepatitis C Infection: A Retrospective Investigation. *J Interf Cytokine Res* [Internet]. 2016  
202 Nov [cited 2019 Jul 25];36(11):644–51. Available from:  
203 <http://www.ncbi.nlm.nih.gov/pubmed/27710263>  
204 11. Lampe JW, Bigler J, Horner NK, Potter JD. UDP-glucuronosyltransferase (UGT1A1\*28  
205 and UGT1A6\*2) polymorphisms in Caucasians and Asians: relationships to serum  
206 bilirubin concentrations. *Pharmacogenetics* [Internet]. 1999 Jun [cited 2019 Jul  
207 25];9(3):341–9. Available from: <http://www.ncbi.nlm.nih.gov/pubmed/10471066>  
208  
209

Figure 1: UGT1A1 Genotypes distribution in Argentinian population

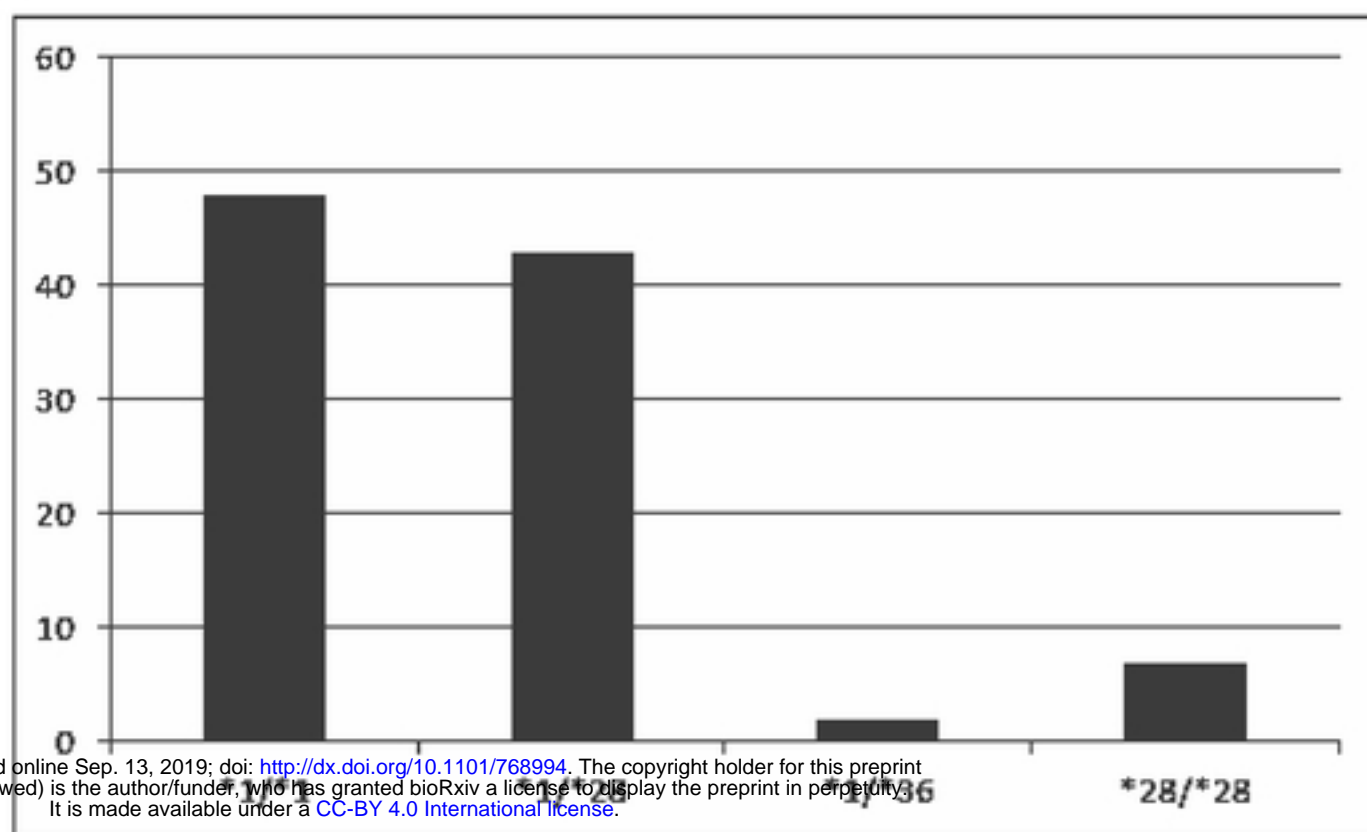

Source: https://www.biorxiv.org/content/biorxiv/early/2019/09/13/768994.full.pdf
